# Supplementary material for: Structure and Properties of Cellulose/Mycelium Biocomposites
Source: MDPI journal article supplement (doi:10.3390/polym14081519), 2022-04-08
Supplement: s1 [file s1]

# Structure and Properties of Cellulose/Mycelium Biocomposites

Adeliya Sayfutdinova <sup>1,\*</sup>, Irina Samofalova <sup>1</sup>, Artem Barkov <sup>1</sup>, Kirill Cherednichenko <sup>1,\*</sup>, Denis Rimashevskiy <sup>2</sup> and Vladimir Vinokurov <sup>1,\*</sup>

<sup>1</sup> Department of Physical and Colloidal Chemistry, Gubkin University, 119991 Moscow, Russia; irinasam2014@yandex.ru (I.S.); mycolab@mail.ru (A.B.)

<sup>2</sup> Department of Traumatology and Orthopedics, RUDN University, 117198 Moscow, Russia; drimashe@yandex.ru

\* Correspondence: sayfutdinova.a@gubkin.ru (A.S.), cherednichenko.k@gubkin.ru (K.C.), vladimir@vinokurov.me (V.V.)

**Table S1.** Nitrogen sources are chosen for biotransformation.

| Nitrogen Source                                           | Fungi Growth |
|-----------------------------------------------------------|--------------|
| NaNO <sub>3</sub>                                         | -*           |
| NH <sub>4</sub> NO <sub>3</sub>                           | -            |
| (NH <sub>4</sub> ) <sub>2</sub> SO <sub>4</sub>           | -            |
| Yeast Extract                                             | -            |
| Peptone                                                   | +            |
| Corn Extract                                              | +            |
| Soybean meal                                              | +            |
| Casein Hydrolyzate                                        | -            |
| (NH <sub>4</sub> ) <sub>2</sub> SO <sub>4</sub> + peptone | -            |

\* The «plus» indicates the successful growth of fungi in the presence of a nitrogen source, the absence of growth is labelled as «minus».

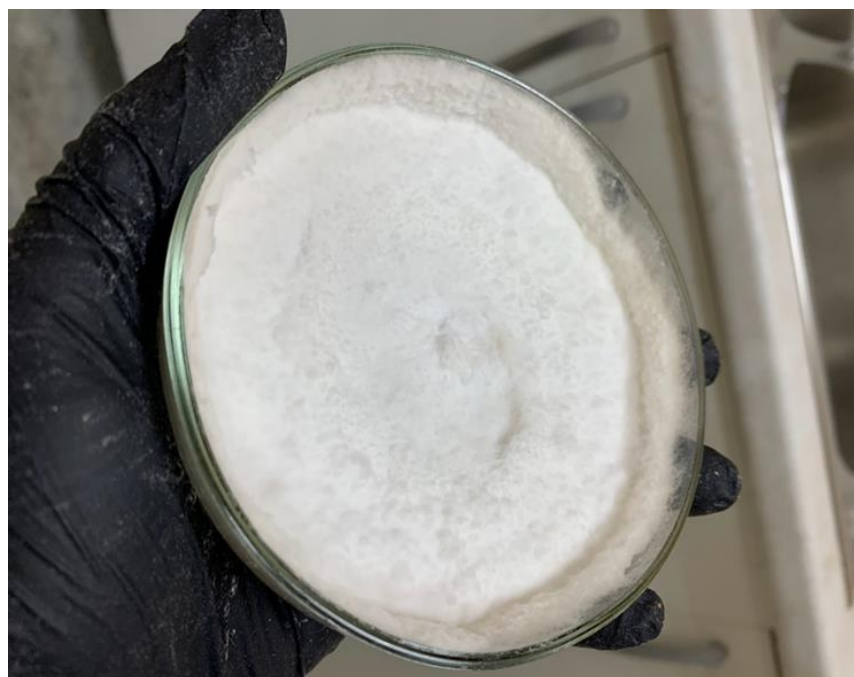

**Figure S1.** The macrophotograph of biotransformed cellulose into fungi mycelium. (The photo was taken by one of the authors).

**Table S2.** The fibrils size distribution and percentile values of the different fibrils in suspensions.

| Sample                  | Dx (10) ( $\mu\text{m}$ ) | Dx (50) ( $\mu\text{m}$ ) | Dx (90) ( $\mu\text{m}$ ) | Mode  |
|-------------------------|---------------------------|---------------------------|---------------------------|-------|
| CMF                     | 24.1                      | 128                       | 672                       | 119.0 |
| CMF <sub>modified</sub> | 9.6                       | 37                        | 138                       | 35.3  |
| CNF                     | 14.0                      | 52.5                      | 183                       | 52.5  |

**Table S3.** FTIR spectral values of main groups in CMF, CMF<sub>modified</sub> and chitin.

| Vibration Modes                                                   | Wavenumber, $\text{cm}^{-1}$ |                         |              |                |
|-------------------------------------------------------------------|------------------------------|-------------------------|--------------|----------------|
|                                                                   | CMF                          | CMF <sub>modified</sub> | Chitin       | Group          |
| OH stretching                                                     | 3348                         | Broad band              | Broad band   | Glucan, chitin |
| NH- stretching (asymmetric)<br>O-H...O stretching hydrogen-bonded |                              | 3307                    | 3295         | Glucan, chitin |
| NH-stretching (symmetric)                                         |                              |                         | 3095         | Chitin         |
| C-H stretching of $\text{CH}_2$ and $\text{CH}_3$ groups          | 2907                         | 2923                    |              | Glucan         |
| C-H stretching                                                    |                              |                         | 2881         | Chitin         |
| Adsorbed O-H or C=O<br>Amide I band                               | 1642                         | 1647                    | 1650         | Glucan, chitin |
| Amide II band                                                     |                              | 1543                    | 1556         | Chitin         |
| C-H deformation                                                   | 1430                         |                         | 1427         | Glucan, chitin |
| C-H bending and symmetric $\text{CH}_3$<br>deformation            |                              | 1375                    | 1377         | Chitin         |
| In-plane $\text{CH}_2$ deformation<br>Amide III band              | 1317                         | 1313                    | 1311         | Glucan, chitin |
| Amide IV band                                                     |                              | 1245                    | 1282         | Chitin         |
| O-H in-plane bending and C-O stretch<br>(symmetric)               | 1203                         | 1205                    |              | Glucan, chitin |
| C-O-C stretching (asymmetric)                                     | 1109                         |                         | 1153         | Glucan, chitin |
| C-OH stretching                                                   | 1057<br>1035                 | 1045                    | 1066<br>1032 | Glucan, chitin |
| Rocking vibration of $\text{CH}_2$                                | 897                          | 875                     | 899          | Glucan, chitin |
| Out of plane O-H...O hydrogen bonding                             | 655                          | 668                     | 656          | Glucan, chitin |
